# Supplementary material
Source: PubMed Central journal article supplement (PMC6697176)
Supplement: NIHMS970996-supplement.pdf [file NIHMS970996-supplement.pdf]

|                                     | Shrimp             |                    | Pig                |                    |
|-------------------------------------|--------------------|--------------------|--------------------|--------------------|
|                                     | neutral            | acid               | neutral            | acid               |
| <b><math>\alpha</math>-helicity</b> | 0.411 +/- 0.021    | 0.498 +/- 0.021    | 0.332 +/- 0.019    | 0.500 +/- 0.022    |
| <b>Total Energy</b>                 | -7809.8 +/- 1010.8 | -5565.0 +/- 1010.8 | -2115.4 +/- 1010.8 | -422.8 +/- 1010.8  |
| Bond                                | 1720.6 +/- 35.6    | 1720.7 +/- 35.1    | 1690.3 +/- 34.6    | 1692.6 +/- 34.2    |
| Angle                               | 3066.7 +/- 58.8    | 3048.8 +/- 58.3    | 2866.4 +/- 53.1    | 3109.1 +/- 57.7    |
| VDW                                 | -1978.3 +/- 43.1   | -2084.2 +/- 41.8   | -1942.9 +/- 42.3   | -2059.5 +/- 49.3   |
| Elec                                | -18335.2 +/- 758.2 | -16820.1 +/- 659.3 | -12133.2 +/- 752.7 | -11654.7 +/- 628.2 |

**Table S1: MD simulations of pig and shrimp Tpm under neutral and acidic conditions, Related to Figure 6.** Average  $\alpha$ -helicity was specified as  $i$  to  $i+4$  backbone hydrogen bond occupancy. Total internal energy values with bonded (bond and angle) and non-bonded (van der Waals and electrostatic) terms were calculated as an average using the AMBER ff14SB force field.

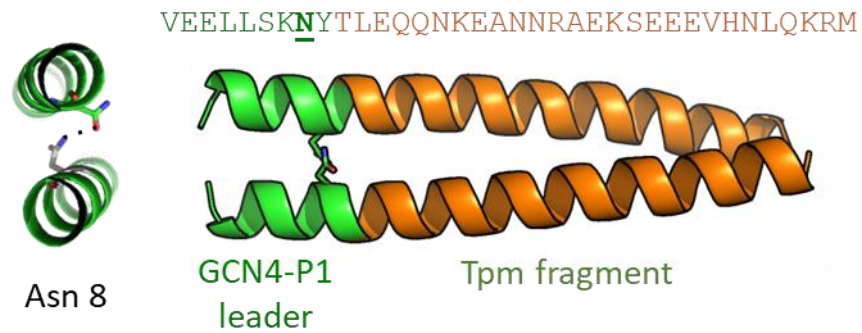

**Figure S1: Stabilizing Tpm peptides based on local sequence, Related to Star Methods.** Peptide design strategy is to add a GCN4-1 derived leader (VEELLSKNY, green) to the Tpm fragment (orange) with a core Asn-Asn hydrogen bond that constrains topology to a coiled-coil homodimer. This ensures that peptides derived from any Tpm sequence can produce its native structure.

**Table S2. Tpm fragment peptide sequences, Related to Star Methods and Key Resource Table.**

| <i>name</i> | <i>sequence</i>                                           | <i>Tpm positions</i> |
|-------------|-----------------------------------------------------------|----------------------|
|             | <b>GCN4 Leader</b>                                        | <b>Tpm Fragment</b>  |
| S1          | Ac-VEELLSKNY AIKKKMQAMKLEKDNAMDRADTLEQQN-NH <sub>2</sub>  | 3-29                 |
| S2          | Ac-VEELLSKNY TLEQQNKEANNRAEKSEEEVHNLQKRM-NH <sub>2</sub>  | 24-50                |
| S3          | Ac-VEELLSKNY KSEEEVHNLQKRMQQLENDLDQVQESL-NH <sub>2</sub>  | 38-64                |
| S4          | Ac-VEELLSKNY QLENDLDQVQESLLKANIQLVEKDKAL-NH <sub>2</sub>  | 52-78                |
| S5          | Ac-VEELLSKNY EKDKALSNAEGEVAALNRRRIQLLEEDL-NH <sub>2</sub> | 73-99                |
| S6          | Ac-VEELLSKNY ALNRRRIQLLEEDLERSEERLNTATTKL-NH <sub>2</sub> | 87-113               |
| S7          | Ac-VEELLSKNY RSEERLNTATTKLAEASQAADESERMR-NH <sub>2</sub>  | 101-127              |
| S8          | Ac-VEELLSKNY VLENRSLSDDEERMDALENQLKEARFLA-NH <sub>2</sub> | 129-155              |
| S9          | Ac-VEELLSKNY EARFLAEADRKYDEVARKLAMVEADL-NH <sub>2</sub>   | 150-176              |
| S10         | Ac-VEELLSKNY MVEADLERAEERAETGESKIVELEEEEL-NH <sub>2</sub> | 171-197              |
| S11         | Ac-VEELLSKNY TGESKIVELEEEELRVVGNLKSLEVSE-NH <sub>2</sub>  | 185-211              |
| S12         | Ac-VEELLSKNY VVGNLKSLEVSEEKANQREEAYKEQI-NH <sub>2</sub>   | 199-225              |
| S13         | Ac-VEELLSKNY TLTNKLKAAEARAEFAERSVQKLQKEV-NH <sub>2</sub>  | 227-253              |
| S14         | Ac-VEELLSKNY RLEDELVNEKEKYKSITDELDQTFSEL-NH <sub>2</sub>  | 255-281              |
| P1          | Ac-VEELLSKNY AIKKKMQLKLDKENALDRAEQAEADK-NH <sub>2</sub>   | 3-29                 |
| P2          | Ac-VEELLSKNY QAEADKKAEDRSKRLEDELVSLQKKL-NH <sub>2</sub>   | 24-50                |
| P3          | Ac-VEELLSKNY RLEDELVSLQKKLKATEDELDKYSEAL-NH <sub>2</sub>  | 38-64                |
| P4          | Ac-VEELLSKNY ATEDELDKYSEAPKDAQEKLELAEKKA-NH <sub>2</sub>  | 52-78                |
| P5          | Ac-VEELLSKNY LAEKKATDAEADVASLNRRRIQLVEEEL-NH <sub>2</sub> | 73-99                |
| P6          | Ac-VEELLSKNY SLNRRRIQLVEEELDRAQERLATALQKL-NH <sub>2</sub> | 87-113               |
| P7          | Ac-VEELLSKNY RAQERLATALQKLEEAKEKADESERGM-NH <sub>2</sub>  | 101-127              |
| P8          | Ac-VEELLSKNY VIESRAQKDEEKMEIQEIQLKEAKHIA-NH <sub>2</sub>  | 129-155              |
| P9          | Ac-VEELLSKNY EAKHIAEDADRKYEEVARKLVIIESDL-NH <sub>2</sub>  | 150-176              |
| P10         | Ac-VEELLSKNY IIESDLERAEEAEELSEGKCAELEEEEL-NH <sub>2</sub> | 171-197              |
| P11         | Ac-VEELLSKNY LSEGKCAELEEEELKTVTNNLKSLEAQA-NH <sub>2</sub> | 185-211              |
| P12         | Ac-VEELLSKNY TVTNNLKSLEAQAQEKYSQKEDKYEEEI-NH <sub>2</sub> | 199-225              |
| P13         | Ac-VEELLSKNY VLSDKLKEAETRAEFAERSVTKLEKSI-NH <sub>2</sub>  | 227-253              |
| P14         | Ac-VEELLSKNY DLEDELYAQKLKYKAISEELDHALNDM-NH <sub>2</sub>  | 255-281              |

Ac N-terminal acetylation

-NH<sub>2</sub> C-terminal amidation

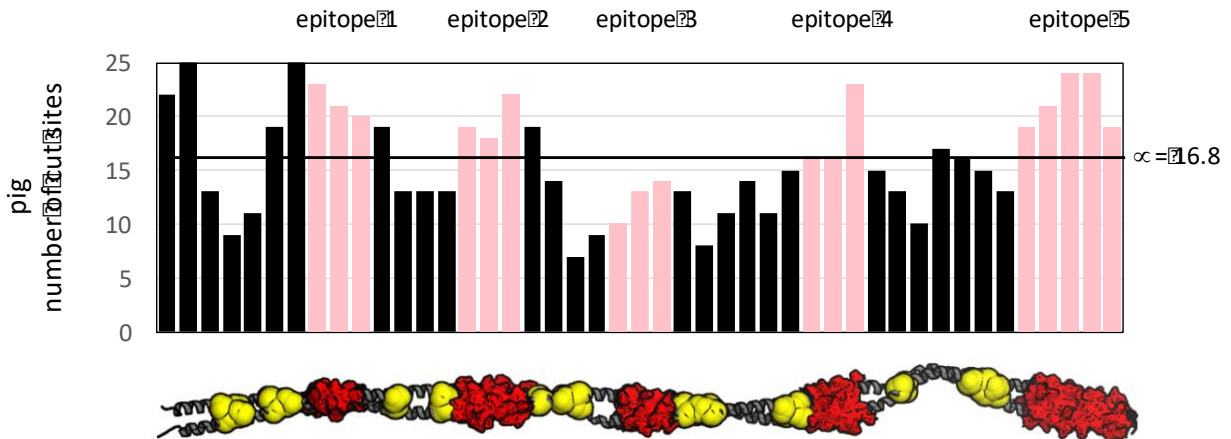

**Figure S2. Pig Tpm Proteolysis, Related to Figure 6.** Number of pepsin, trypsin and chymotrypsin cleavage sites for 16-aa fragments of pig Tpm starting every six residues (i.e. 1-16, 7-22 ...). Pink bars indicate fragments that overlap with sequence regions corresponding to epitopes from shrimp Tpm. Epitope-related regions are consistently above the mean number of cleavage sites ( $m = 16.8$  sites / fragment).

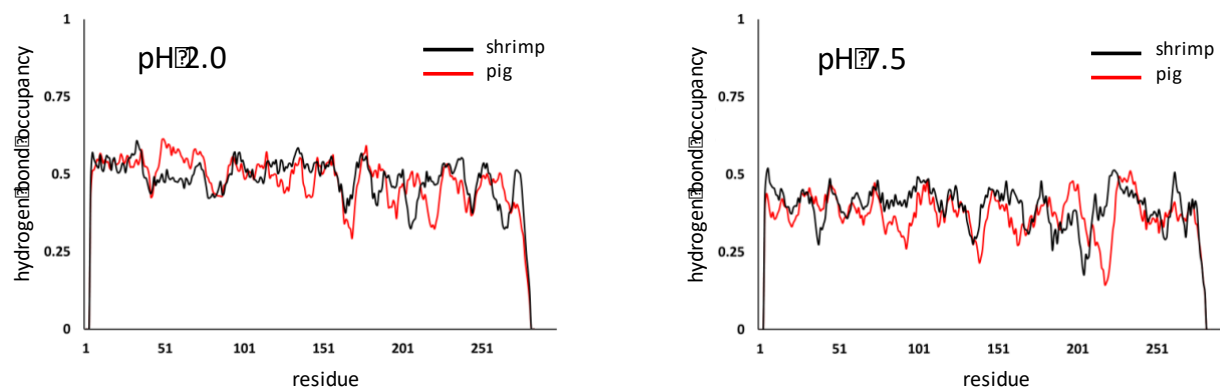

**Figure S3. Mean  $\alpha$ -helicity for Tpm, Related to Figure 6.** MD production runs (70 ns) measured as  $i, i+4$  backbone amide – backbone carbonyl hydrogen bond occupancy (N-O distance  $< 3.0\text{\AA}$ , N-H-O angle  $> 135^\circ$ ).

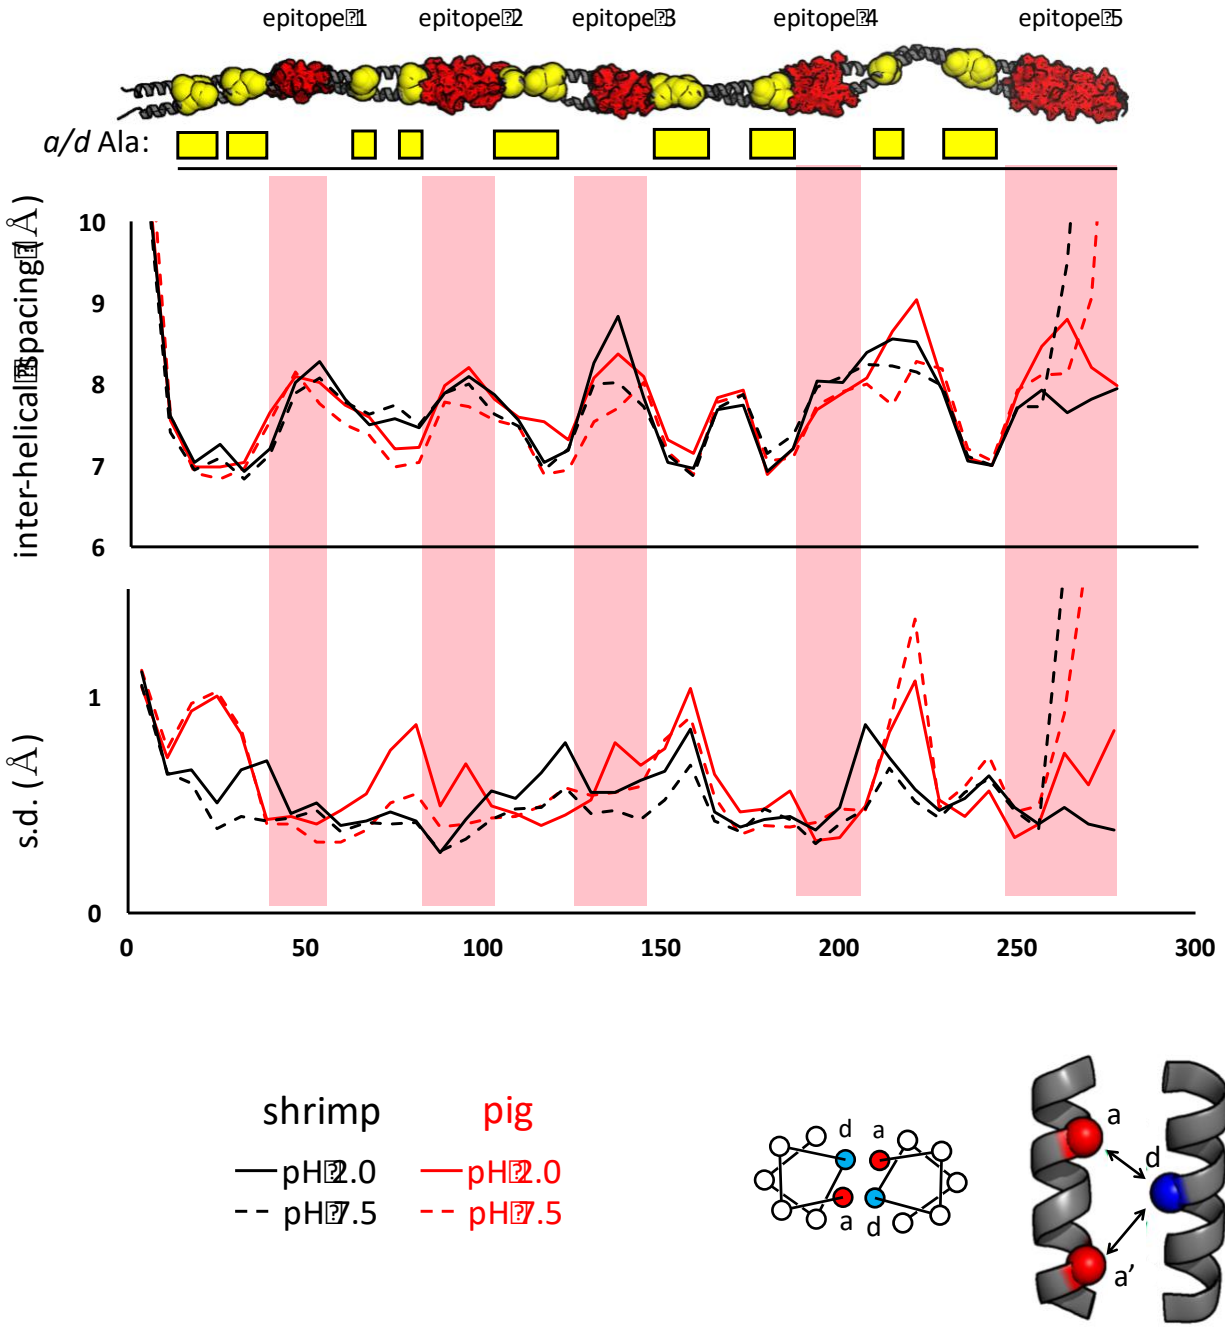

**Figure S4. MD analysis of local and global Tpm dynamics, Related to Figure 6.** Epitopes (red) and *a* or *d* heptad position Ala-clusters (yellow) highlighted on a model of the Tpm coiled coil. Interhelical spacing is calculated between the *d* position on one chain and the *a* and *a'* positions on the neighboring chain as  $(da + da')/2$ . Mean interhelical spacing and standard deviation of spacing are shown for both shrimp and pig Tpm molecular dynamics trajectories at acid and neutral pH.

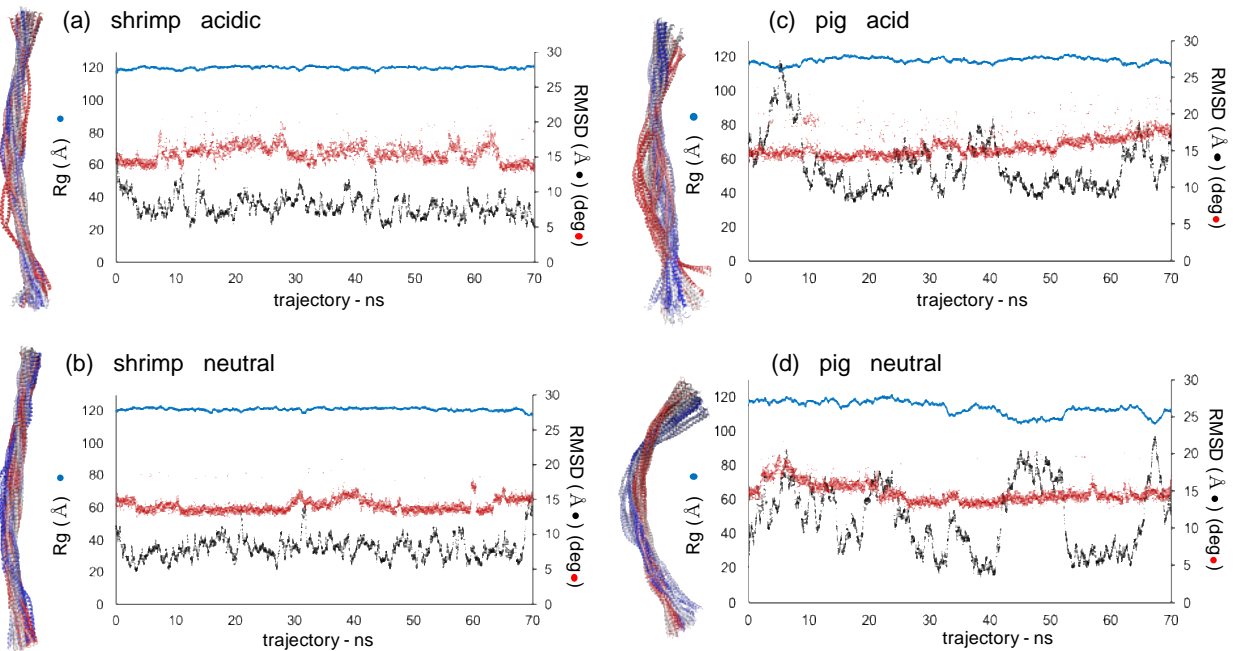

**Figure S5. Global descriptors of Tpm conformational dynamics, Related to Figure 7.** Radius of gyration (Rg) and Cartesian RMSD are computed using C $\alpha$  positions only. Angular RMSD based on backbone phi and psi torsions.

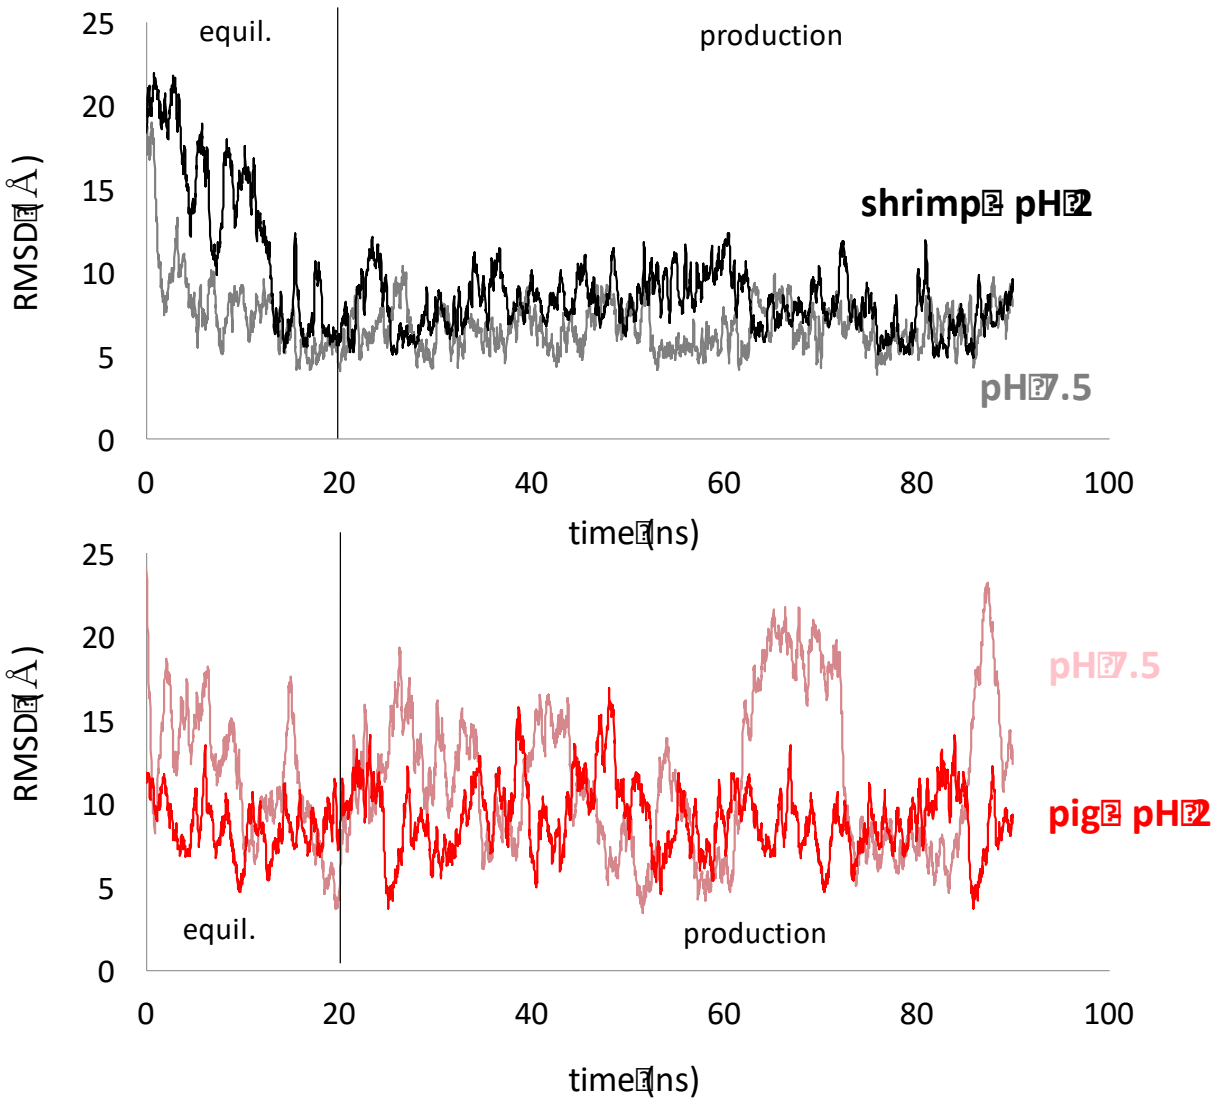

**Figure S6. RMSD of entire trajectories for shrimp and pig Tpm and acidic and neutral pH, Related to Star Methods and Figures 6, 7. The 70 ns production run starts after a 20 ns equilibration phase.**
